# Supplementary material for: Highly-controllable drug release from core cross-linked singlet oxygen-responsive nanoparticles for cancer therapy
Source: Royal Society of Chemistry journal article supplement (doi:10.1039/d0ra02053b), 2020-01-01
Supplement: d0ra02053b1.pdf [file d0ra02053b1.pdf]

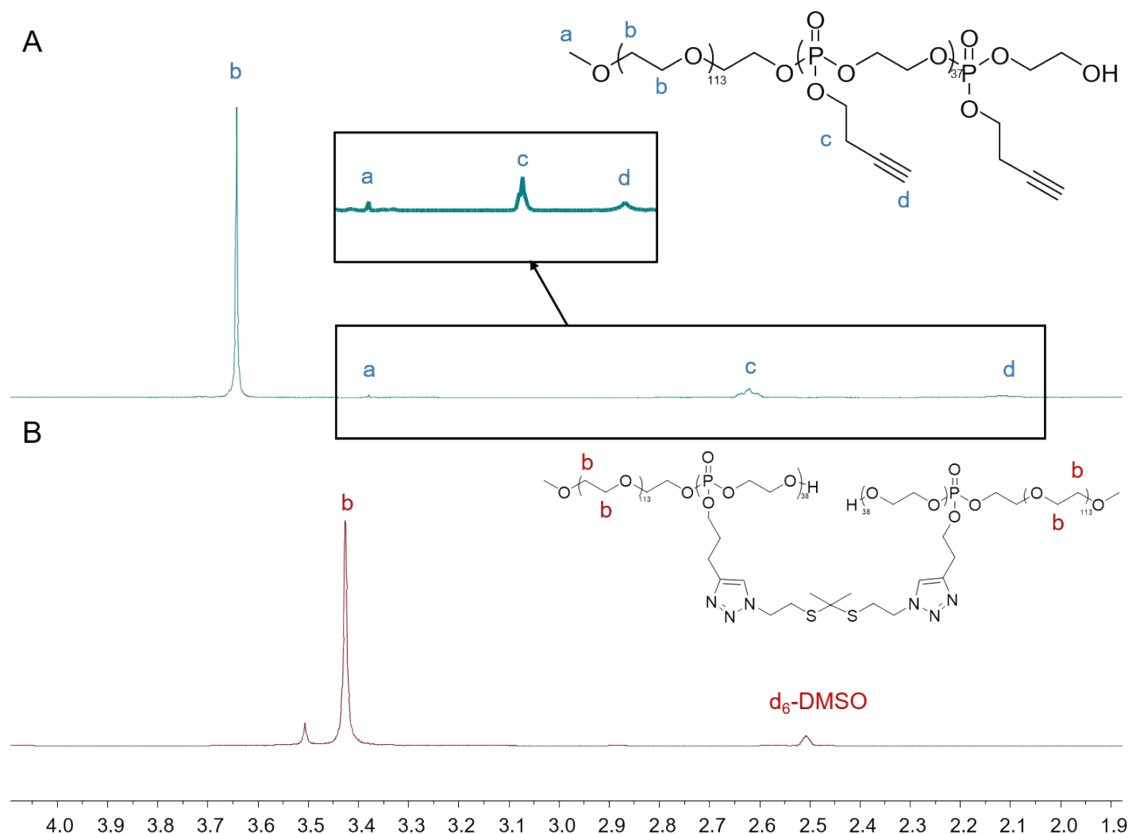

**Figure S1.**  $^1\text{H}$ -NMR spectrum of (A) PPE in  $\text{CDCl}_3$  and (B) TK-PPE in  $\text{d}_6$ -DMSO recorded on the AVANCE III 400 MHz spectrometer.

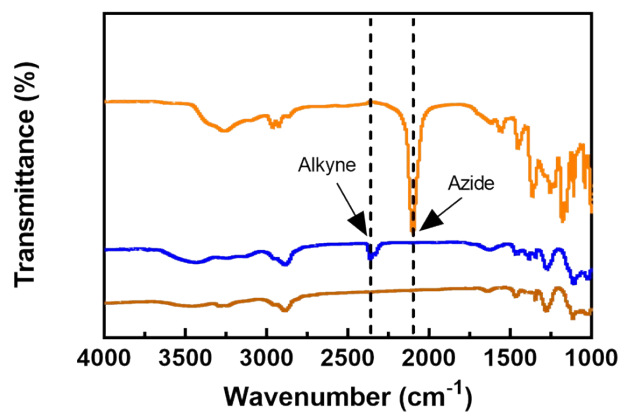

**Figure S2.** FT-IR spectrum of TK, PPE and TK-PPE. The arrows represented the characteristic peaks of alkynyl groups ( $2300\text{ cm}^{-1}$ ) and azide groups ( $2100\text{ cm}^{-1}$ ). From top to bottom: TK-linker (orange), PPE (blue), TK-PPE (brown).

**Table S1.** Drug loading content (DLC) and encapsulation efficiency (EE) of Ce6 and DOX for TK-PPE<sub>Ce6</sub>, TK-PPE<sub>DOX</sub> and TK-PPE<sub>Ce6&DOX</sub>.

|                               | DLC (%) |      | EE (%) |      |
|-------------------------------|---------|------|--------|------|
|                               | Ce6     | DOX  | Ce6    | DOX  |
| TK-PPE <sub>DOX</sub>         | /       | 6.28 | /      | 69.1 |
| TK-PPE <sub>Ce6</sub>         | 2.96    | /    | 32.6   | /    |
| TK-PPE <sub>Ce6&amp;DOX</sub> | 2.90    | 6.17 | 34.8   | 74.0 |

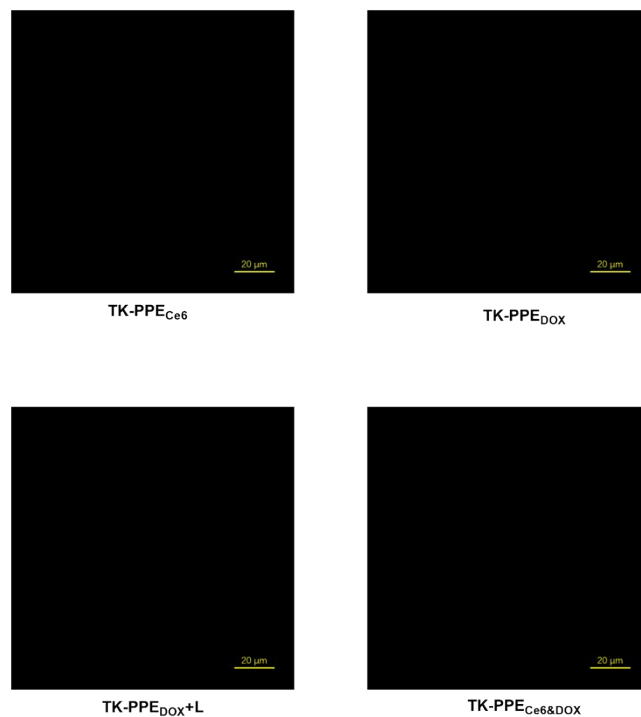

**Figure S3.** Immunofluorescence microscopy images of MCF-7 cells incubated with TK-PPE<sub>Ce6</sub>, TK-PPE<sub>DOX</sub> and TK-PPE<sub>Ce6&DOX</sub> respectively, and then treated DCFH-DA with or without 660 nm laser irradiation (0.2 W/cm<sup>2</sup>, 15 min). The scale bar is 20 μm.

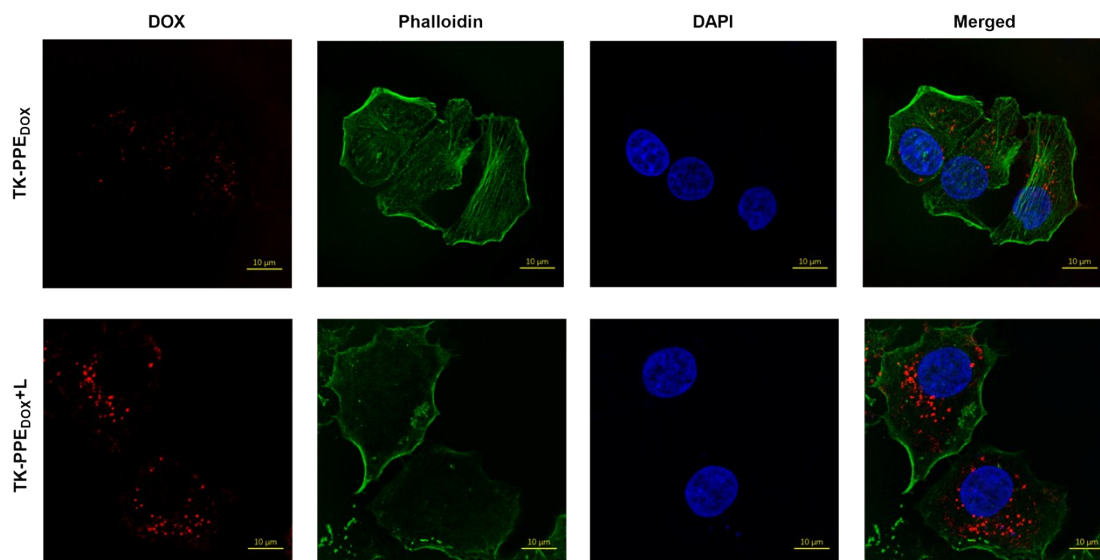

**Figure S4.** Assessment of intracellular DOX release and biodistribution in MCF-7 cells of TK-PPE<sub>DOX</sub> with or without irradiation (660 nm, 0.2 W/cm<sup>2</sup>, 30 min). Cell nucleus and F-actin were counterstained with DAPI (6-diamidino-2- phenylindole, blue) and Alexa Fluor 488 phalloidin (green). The scale bar is 10 μm.
